# Supplementary material for: Cas9 Variants Expand the Target Repertoire in Caenorhabditis elegans
Source: Oxford University Press journal article supplement (doi:10.1534/genetics.115.185041), 2015-12-17
Supplement: figures1.pdf [file figures1.pdf]

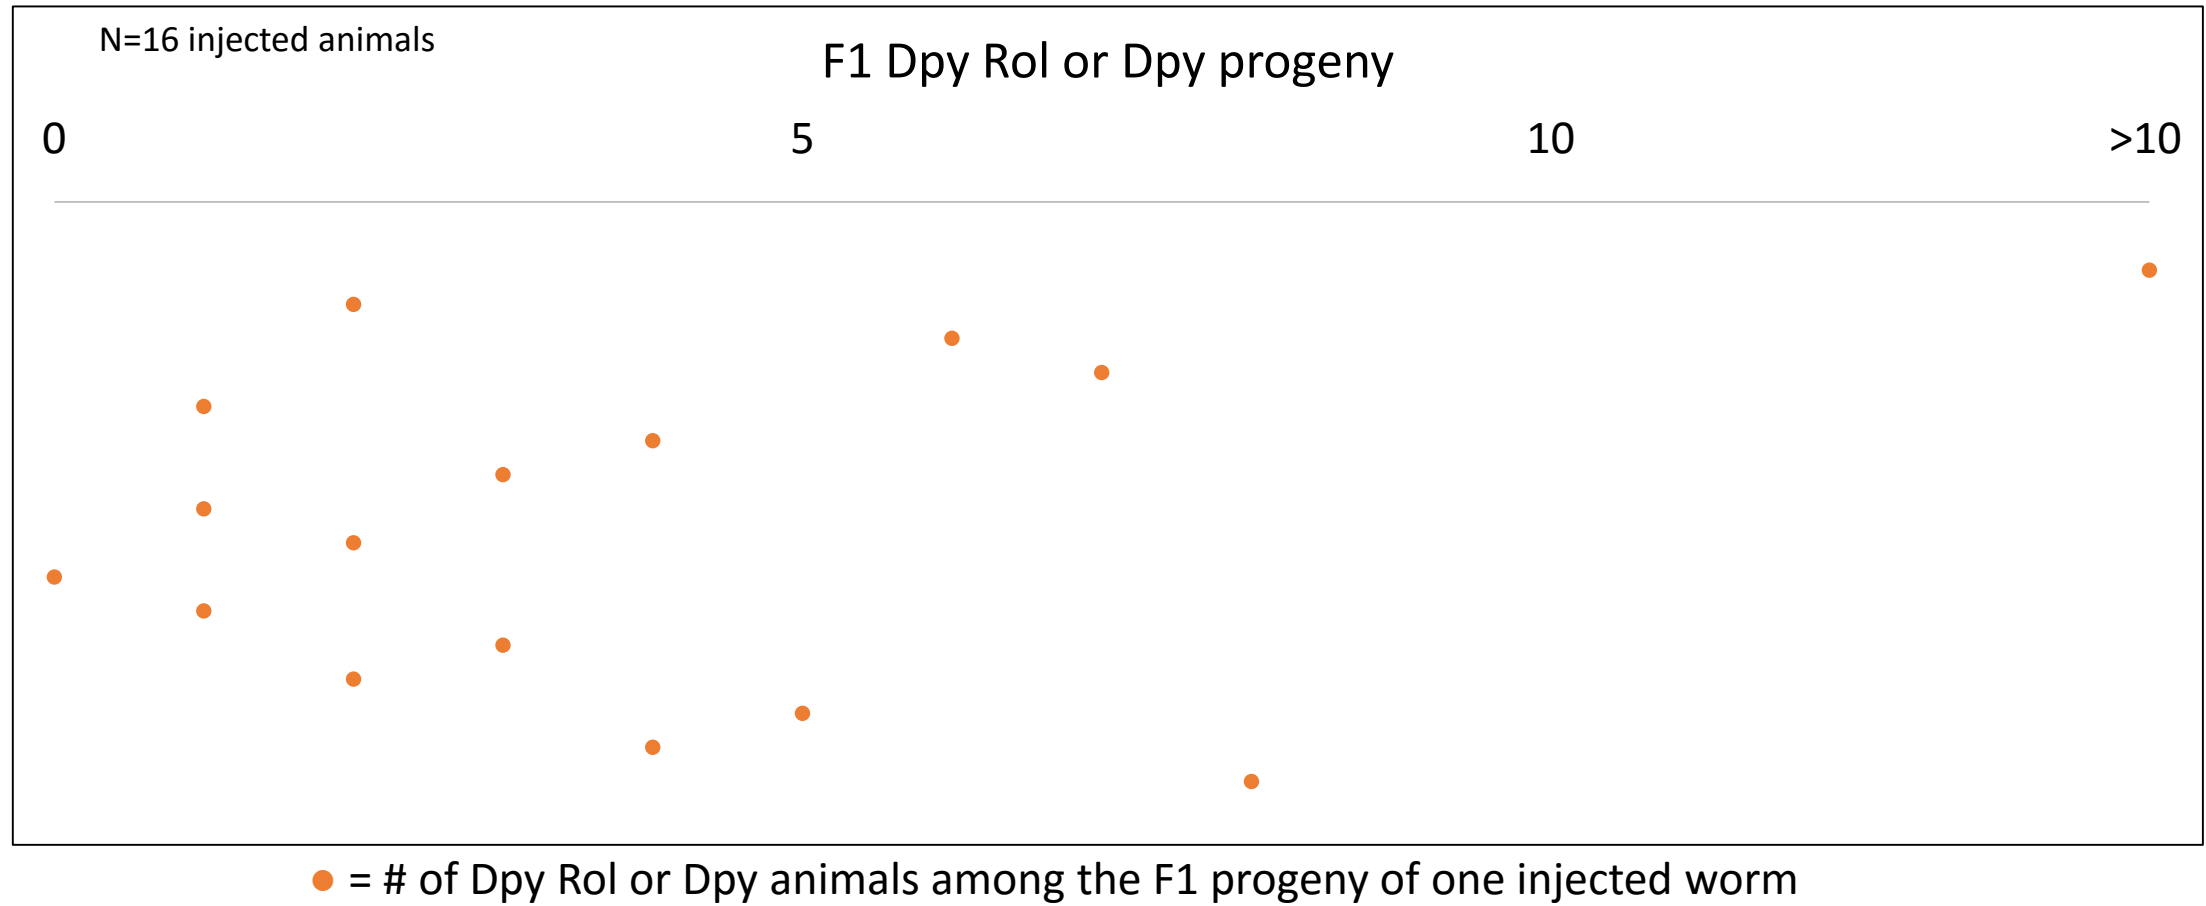

**Figure S1: Dpy Rol and Dpy animals among the F1 progeny of worms injected with only the VRER Cas9 in the PAM stringency co-conversion experiment**

These observations provided evidence for the activity of the VRER Cas9 in addition to the appearance of the Rol and Dpy Unc progeny depicted in Figure 4e.
