# Supplementary material for: Cas9 Variants Expand the Target Repertoire in Caenorhabditis elegans
Source: Oxford University Press journal article supplement (doi:10.1534/genetics.115.185041), 2015-12-17
Supplement: figures2.pdf [file figures2.pdf]

## Expansion of target repertoire in coding sequence

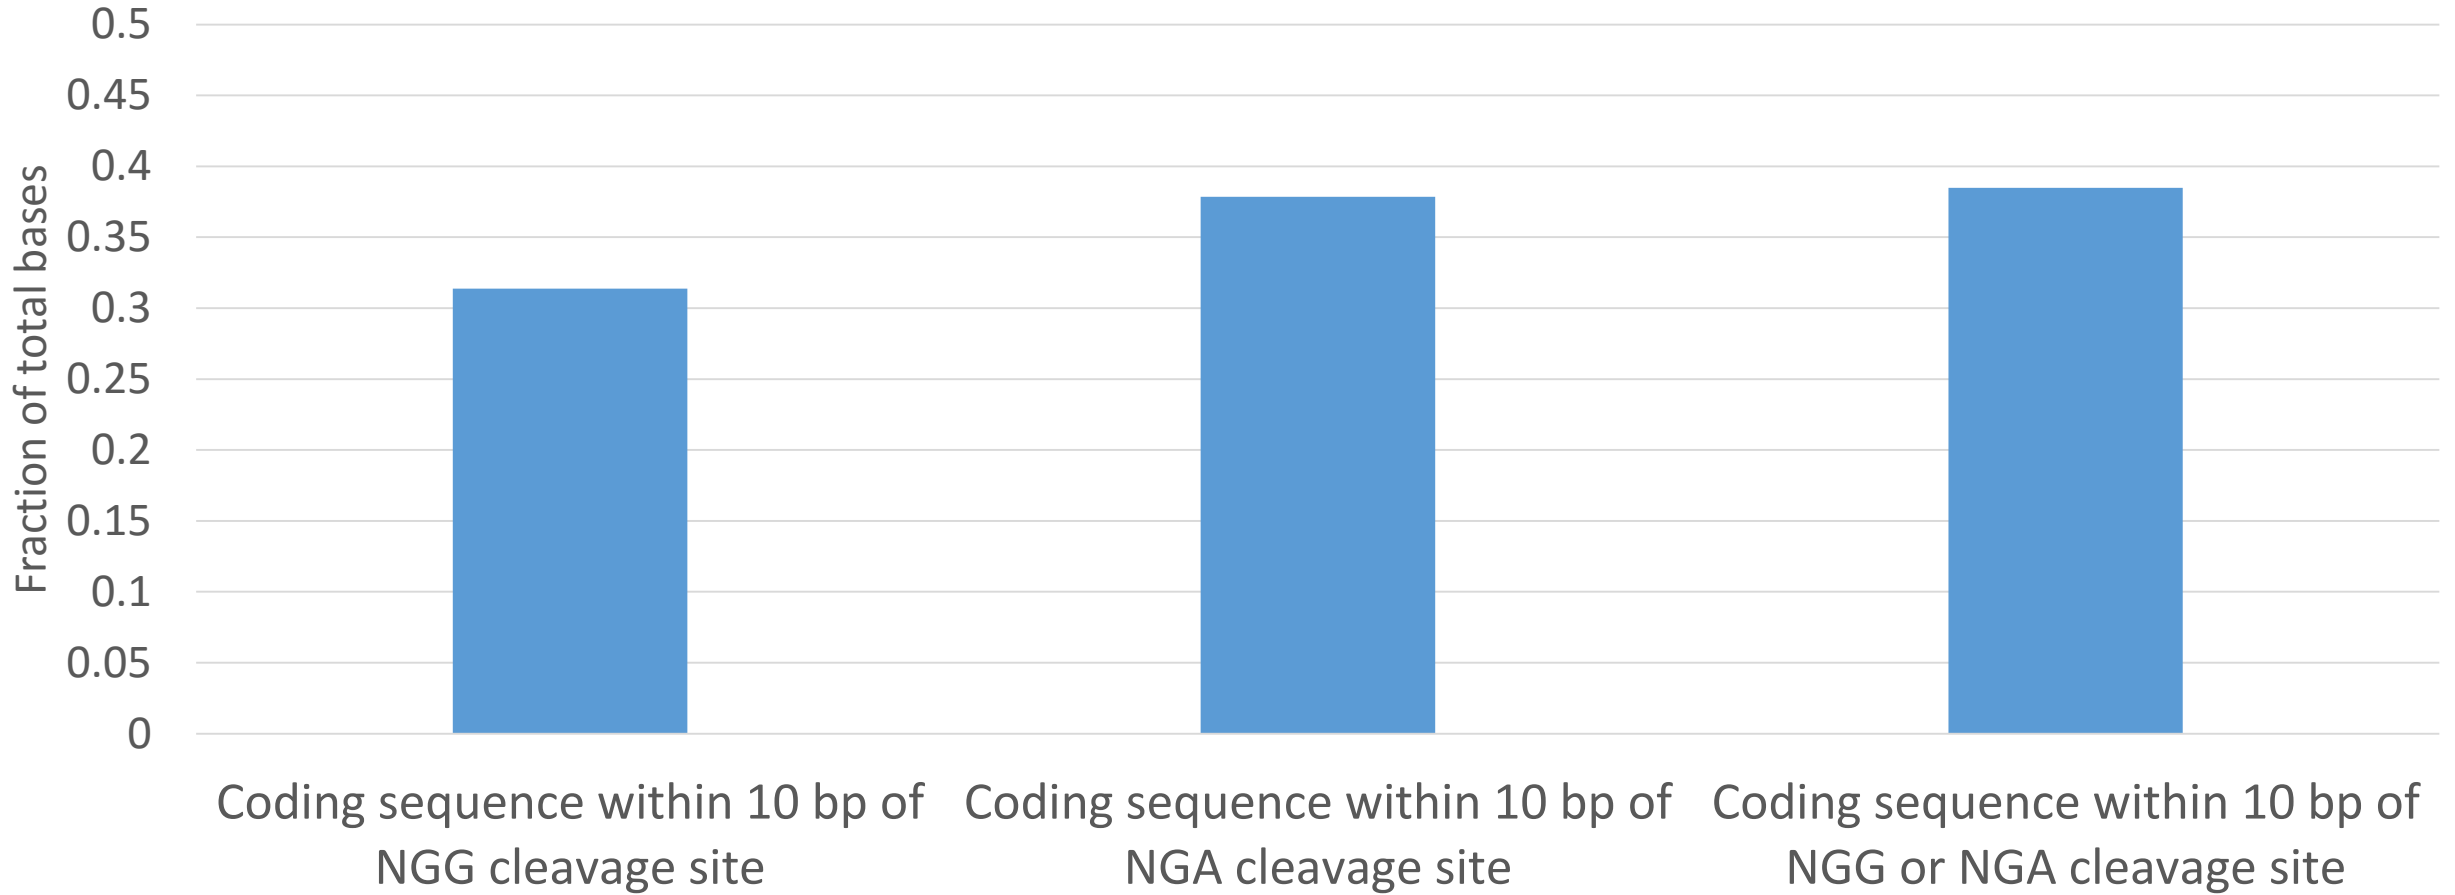

**Figure S2a: The fraction of all bases in the annotated *C. elegans* RefSeq genes which have Cas9 cleavage sites within 10 bp induced using NGG, or NGA, or either NGG or NGA PAMs.**

The bases depicted meet the following criteria: 1. A distance of  $\leq 10$  bp from a Cas9 induced cleavage site, and 2. The associated sgRNA sequence would have no runs of more than 4 T bases and a GC content between 20-80%.

## Enlargement of target repertoire in coding sequence

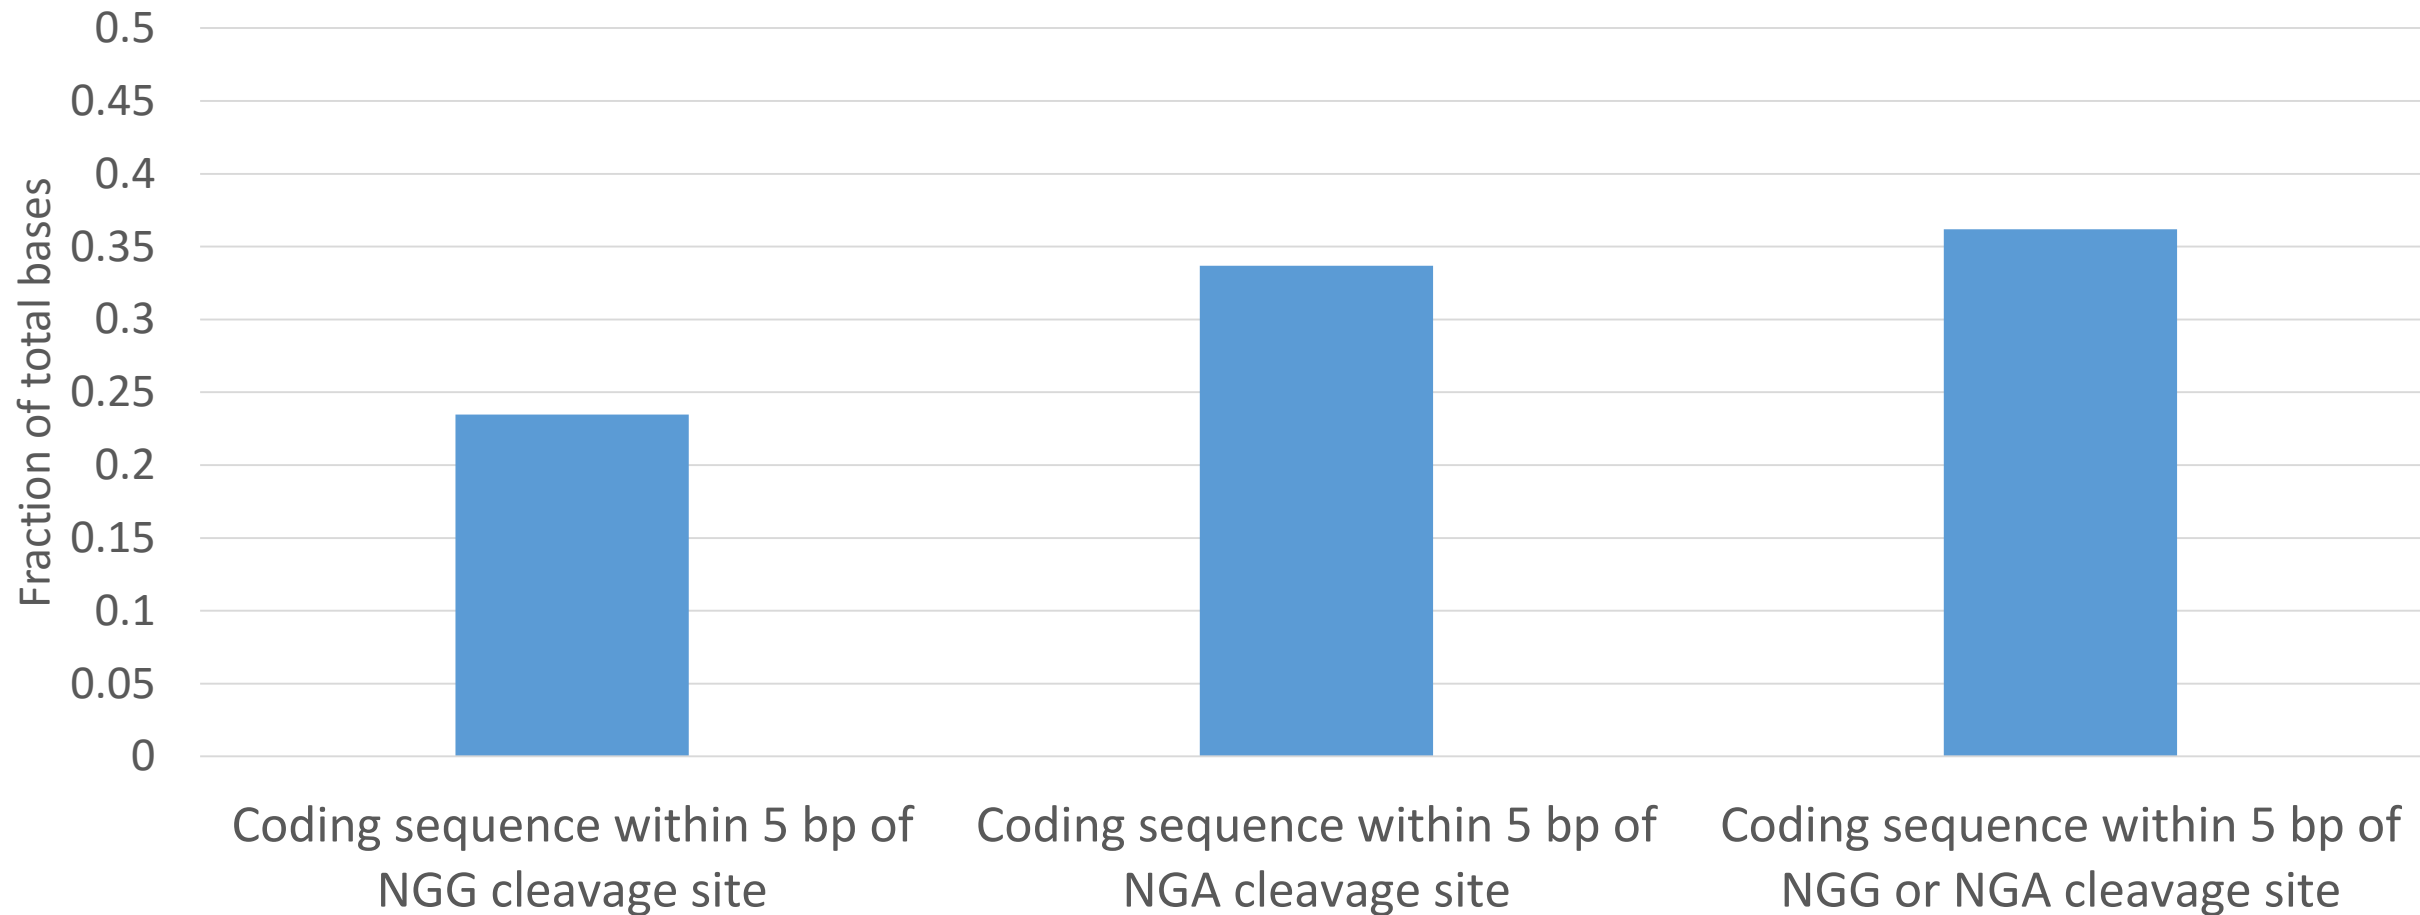

**Figure S2b: The fraction of all bases in the annotated *C. elegans* RefSeq genes which have Cas9 cleavage sites within 5 bp induced using NGG, or NGA, or either NGG or NGA PAMs.**

The bases depicted meet the following criteria: 1. A distance of  $\leq 5$  bp from a Cas9 induced cleavage site, and 2. The associated sgRNA sequence would have no runs of more than 4 T bases and a GC content between 20-80%.

## Expansion of 3' UTR target repertoire

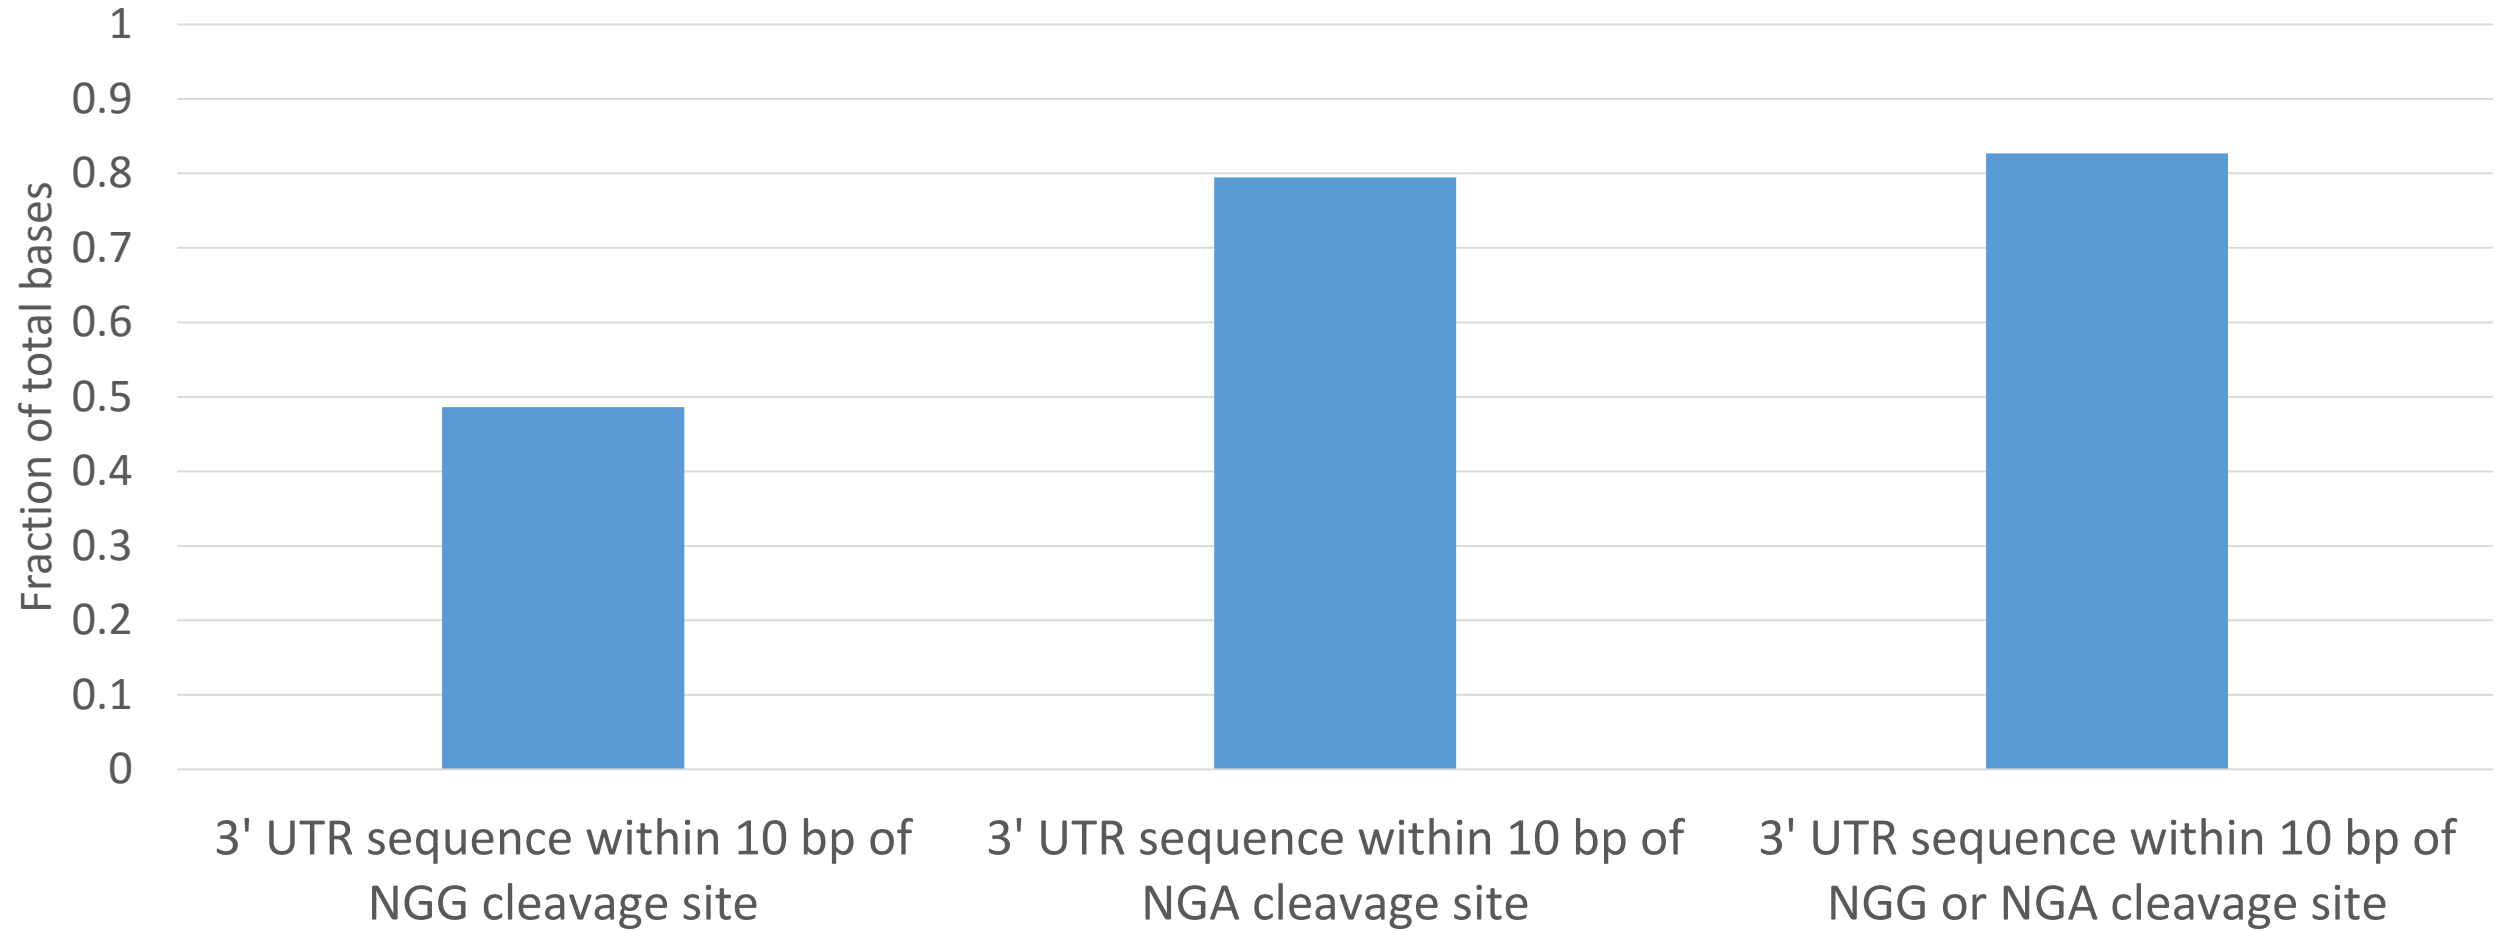

**Figure S2c: The fraction of all bases in *C. elegans* 3' UTRs which have Cas9 cleavage sites within 10 bp induced using NGG, or NGA, or either NGG or NGA PAMs.**

The bases depicted meet the following criteria: 1. A distance of  $\leq 10$  bp from a Cas9 induced cleavage site, and 2. The associated sgRNA sequence would have no runs of more than 4 T bases and a GC content between 20-80%.

## Expansion of 3' UTR target repertoire

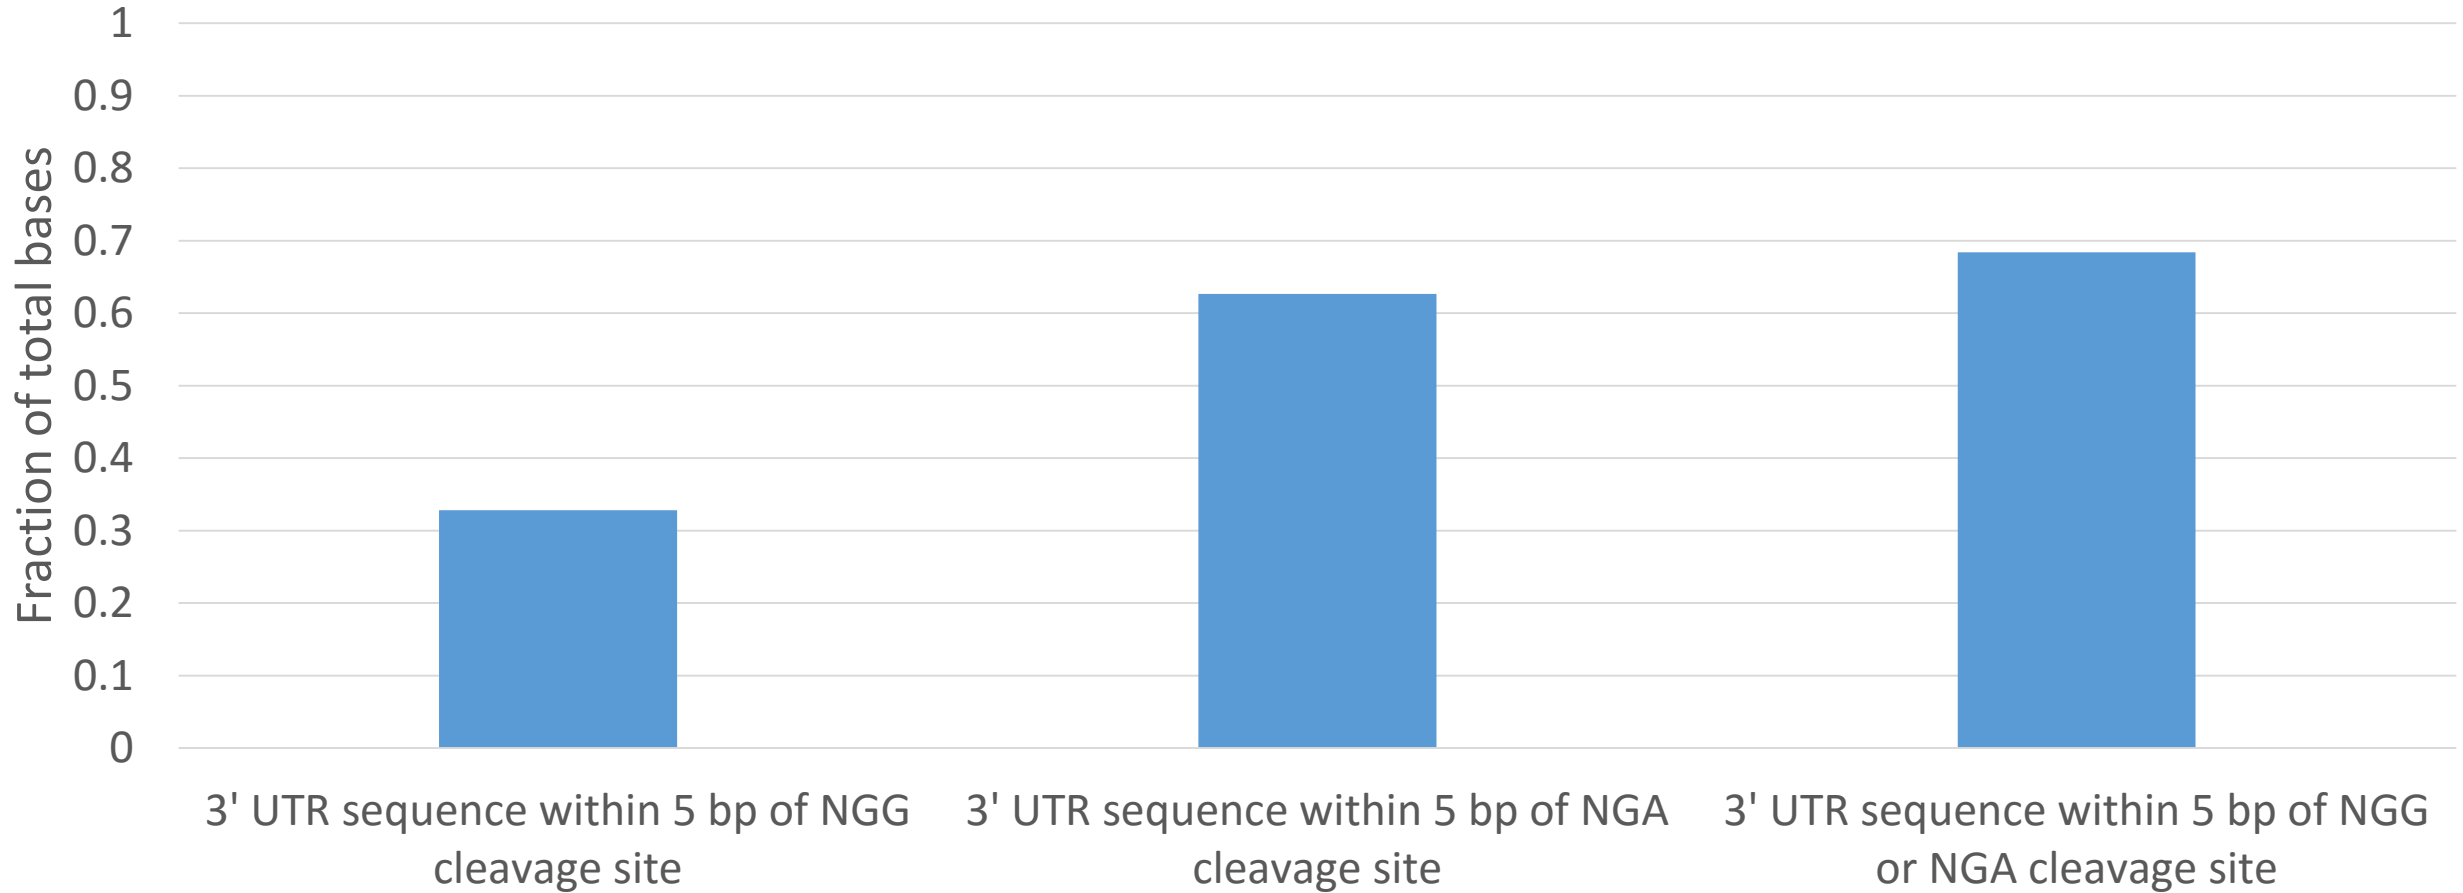

**Figure S2d: The fraction of all bases in *C. elegans* 3' UTRs which have Cas9 cleavage sites within 5 bp induced using NGG, or NGA, or either NGG or NGA PAMs.**

The bases depicted meet the following criteria: 1. A distance of  $\leq 5$  bp from a Cas9 induced cleavage site, and 2. The associated sgRNA sequence would have no runs of more than 4 T bases and a GC content between 20-80%.
